# Supplementary material for: A novel 3-fold interpenetration metal–organic framework with tunable luminescence and selective adsorption of CO2 properties
Source: Royal Society of Chemistry journal article supplement (doi:10.1039/c5nj01639h), 2015-01-01
Supplement: c5nj01639h1.pdf [file c5nj01639h1.pdf]

## Supporting Information

# A Novel 3-fold Interpenetration Metal–Organic Framework with Tunable Luminescence and Selective Adsorption of CO<sub>2</sub> Properties

Rong-Guang Lin,\* Jian-Di Lin and Yu-Lin Wang

College of Life Sciences, Fujian Agriculture and Forestry University, Fuzhou, 350002, P. R. China. E-mail: [rglin@fafu.edu.cn](mailto:rglin@fafu.edu.cn)

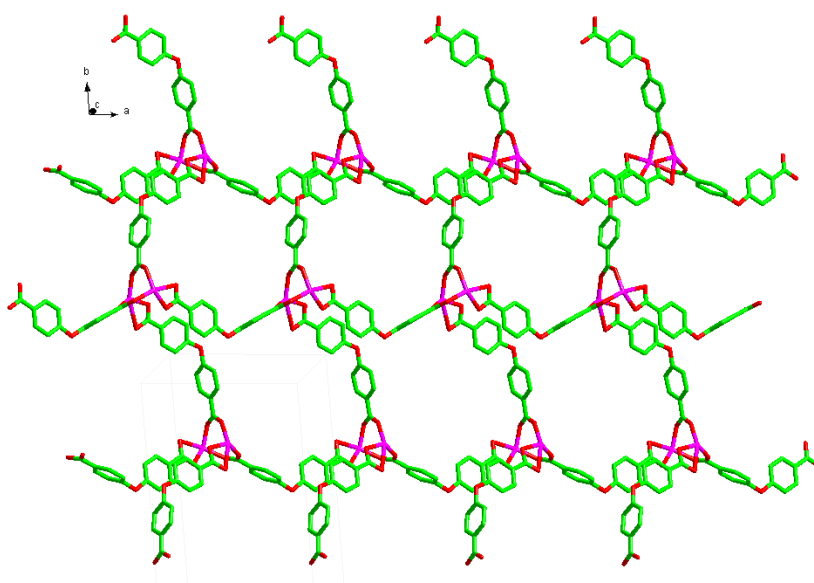

**Figure S1.** Along *c* axis direction, the two-dimensional layers in polymer 1.

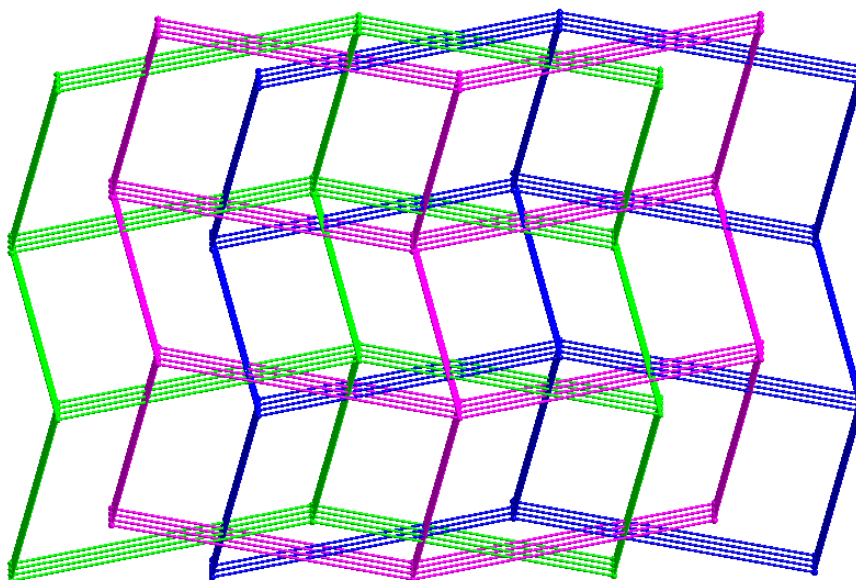

**Figure S2.** Schematic description of the 6-connected  $\alpha$ -Po nets.

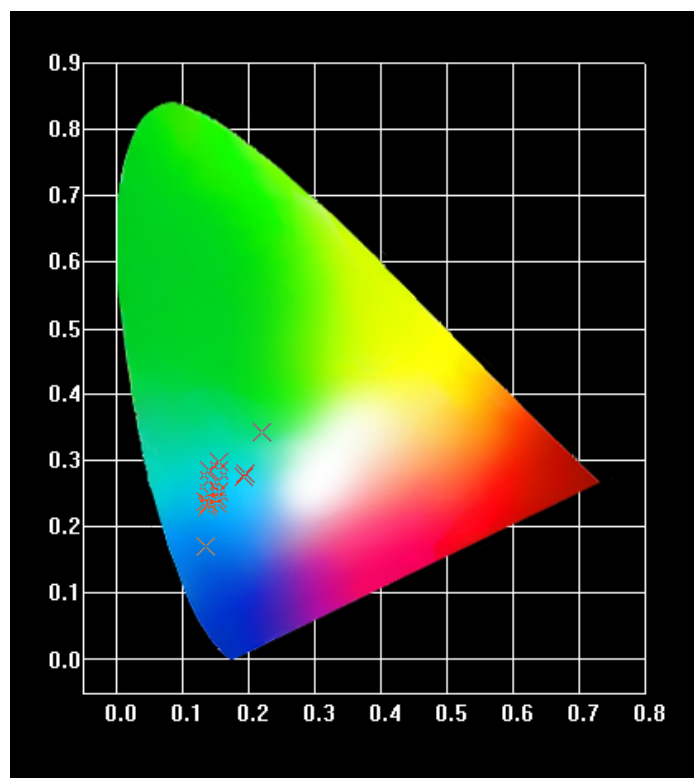

**Figure S3.** The CIE chromaticity coordinates of the emissions spectrum excited at 285–380 nm.

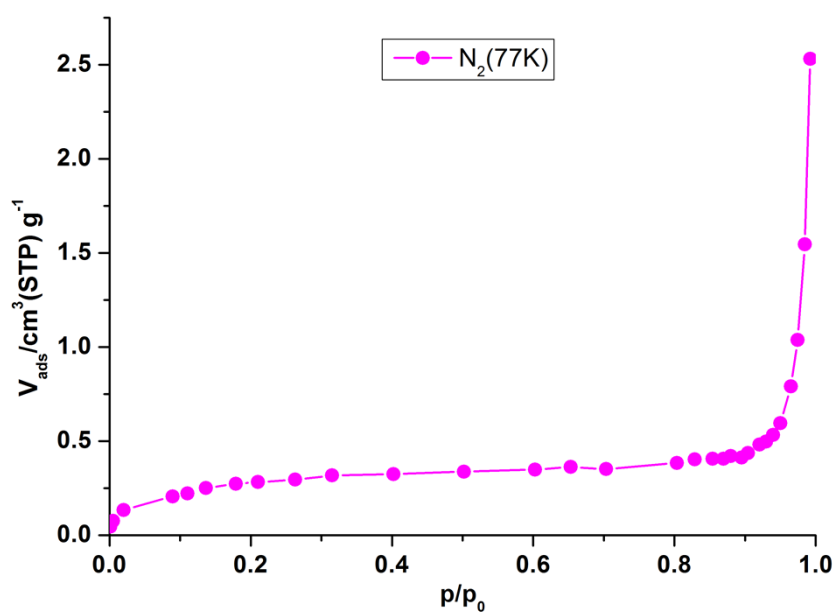

**Figure S4.** Adsorption isotherms of  $N_2$  at 77 K of 1.

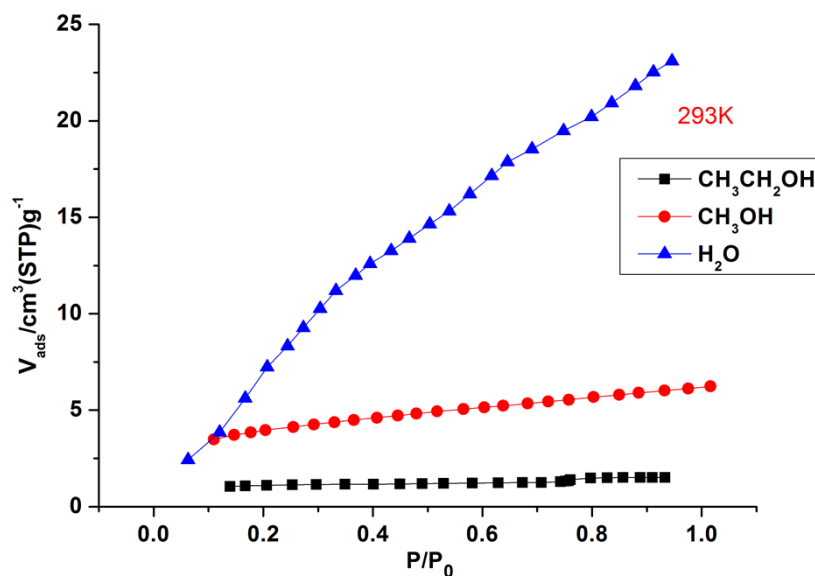

**Figure S5.** Comparison of vapor adsorption isotherms of **1** for water, ethanol and methanol vapour at 293 K.

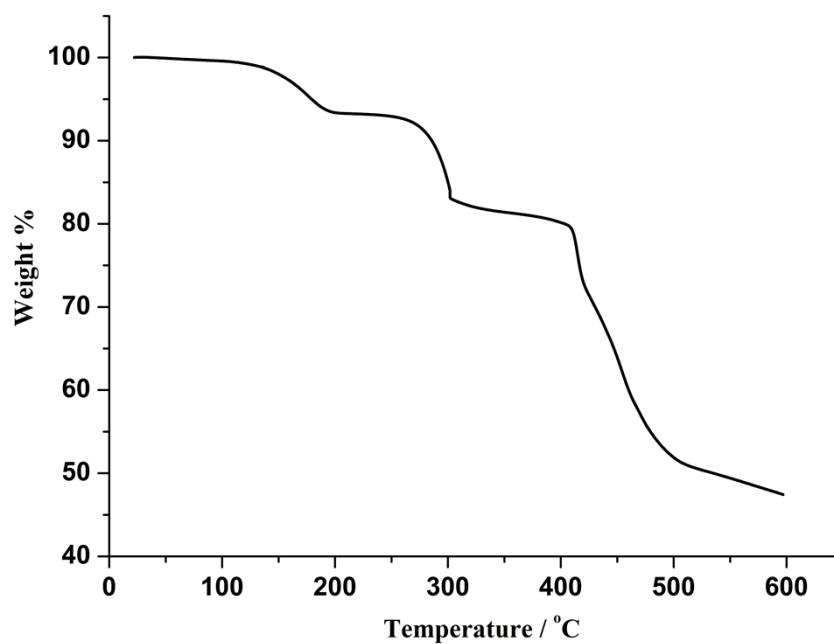

**Figure S6.** TG curve of as-synthesized **1**.

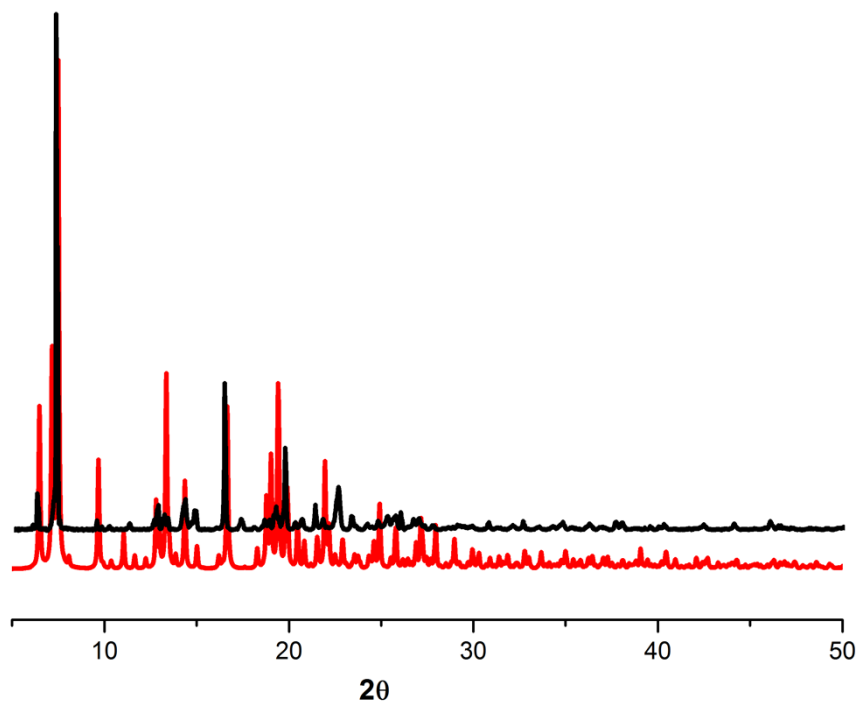

**Figure S7.** Powder XRD patterns for **1**: (red: simulated one; black: the as-synthesized sample).

**Table S1.** Crystallographic data for **1**.

| <b>1</b>                                                                |                                        |
|-------------------------------------------------------------------------|----------------------------------------|
| Chemical formula                                                        | $C_{52}H_{48}N_6O_{16}Zn_2$            |
| $M_r$                                                                   | 1143.70                                |
| Crystal system, space group                                             | Monoclinic, $P2_1/c$                   |
| Temperature (K)                                                         | 296                                    |
| $a, b, c$ (Å)                                                           | 14.5740 (7), 23.5585 (11), 15.4557 (7) |
| $\beta$ (°)                                                             | 110.801 (3)                            |
| $V$ (Å <sup>3</sup> )                                                   | 4960.7 (4)                             |
| $Z$                                                                     | 4                                      |
| $\mu$ (mm <sup>-1</sup> )                                               | 1.531                                  |
| Crystal size (mm)                                                       | 0.30 × 0.25 × 0.20                     |
| $T_{\min}, T_{\max}$                                                    | 0.7441, 0.8179                         |
| $R_{\text{int}}$                                                        | 0.0465                                 |
| $(\sin \theta/\lambda)_{\text{max}}$ (Å <sup>-1</sup> )                 | 0.594                                  |
| $R[F^2 > 2\sigma(F^2)], wR(F^2), S$                                     | 0.0474, 0.1262, 1.051                  |
| No. of reflections                                                      | 8734                                   |
| No. of parameters                                                       | 623                                    |
| No. of restraints                                                       | 20                                     |
| $\Delta\rho_{\text{max}}, \Delta\rho_{\text{min}}$ (e Å <sup>-3</sup> ) | 0.498, -0.391                          |

**Table S2** Selected geometric parameters (Å, °)

|                                       |             |                                         |             |
|---------------------------------------|-------------|-----------------------------------------|-------------|
| N1—Zn2                                | 2.026 (3)   | O9—Zn2 <sup>iii</sup>                   | 2.475 (2)   |
| N4—Zn1 <sup>i</sup>                   | 2.029 (3)   | O10—Zn2 <sup>iii</sup>                  | 1.970 (2)   |
| O1—Zn1                                | 1.991 (3)   | Zn1—O4 <sup>iv</sup>                    | 1.931 (2)   |
| O2—Zn2                                | 1.954 (2)   | Zn1—N4 <sup>v</sup>                     | 2.029 (3)   |
| O4—Zn1 <sup>ii</sup>                  | 1.931 (2)   | Zn2—O10 <sup>vi</sup>                   | 1.970 (2)   |
| O6—Zn1                                | 1.927 (3)   | Zn2—O9 <sup>vi</sup>                    | 2.475 (2)   |
| O7—Zn2                                | 1.964 (2)   |                                         |             |
| O6—Zn1—O4 <sup>iv</sup>               | 133.60 (12) | O7—Zn2—O10 <sup>vi</sup>                | 104.17 (10) |
| O6—Zn1—O1                             | 103.89 (11) | O2—Zn2—N1                               | 100.25 (11) |
| O4 <sup>iv</sup> —Zn1—O1              | 103.50 (11) | O7—Zn2—N1                               | 107.27 (11) |
| O6—Zn1—N4 <sup>v</sup>                | 105.99 (13) | O10 <sup>vi</sup> —Zn2—N1               | 102.54 (11) |
| O4 <sup>iv</sup> —Zn1—N4 <sup>v</sup> | 108.43 (12) | O2—Zn2—O9 <sup>vi</sup>                 | 84.89 (10)  |
| O1—Zn1—N4 <sup>v</sup>                | 94.38 (12)  | O7—Zn2—O9 <sup>vi</sup>                 | 156.25 (11) |
| O2—Zn2—O7                             | 103.74 (11) | O10 <sup>vi</sup> —Zn2—O9 <sup>vi</sup> | 57.61 (9)   |
| O2—Zn2—O10 <sup>vi</sup>              | 136.44 (11) | N1—Zn2—O9 <sup>vi</sup>                 | 92.55 (10)  |

Symmetry codes: (i)  $x-1, -y+3/2, z-3/2$ ; (ii)  $-x, y+1/2, -z+5/2$ ; (iii)  $x+1, y, z$ ; (iv)  $-x, y-1/2, -z+5/2$ ; (v)  $x+1, -y+3/2, z+3/2$ ; (vi)

$x-1, y, z$ .
